# Supplementary material for: Effect of protic ionic liquid nanostructure on phospholipid vesicle formation
Source: Royal Society of Chemistry journal article supplement (doi:10.1039/c6sm02652d), 2017-01-01
Supplement: c6sm02652d1.pdf [file c6sm02652d1.pdf]

# Phospholipid Vesicle Formation in Protic Ionic Liquids

Saffron J. Bryant,<sup>1</sup> Kathleen Wood,<sup>2</sup> Rob Atkin<sup>3</sup> and Gregory G. Warr<sup>1\*</sup>

1. School of Chemistry, F11, The University of Sydney, NSW 2006, Australia

2. Bragg Institute, ANSTO, Locked Bag 2001, Kirrawee DC, NSW 2232, Australia

3. Discipline of Chemistry, The University of Newcastle, Newcastle, NSW, Australia, 2308, Australia

## Supplementary Information

Figures S1-S8 show the scattering patterns and models of best fit for all of the lipid/solvent combinations and temperatures. The parameters for these models of best fit are shown in Tables S1 and S2.

The SFF Model (see ref. 48) does not have a polydispersity component which is why some of the model curves for ULVs display wave-like oscillation that is not present in the scattering data.

Table S2 demonstrates that for the multilamellar vesicles (see ref 47), the repeat spacing ( $D^*$ ) obtained from fitting was a reasonable match to  $D^*$  calculated by the peak position, in most cases.

Figure S9 and Table S3 demonstrate why some of the ranges of possible thickness values are so broad. The parameters of each of the fits are vastly different, as shown in Table S3, and yet the quality of fits are comparable, as shown in Figure S9. For consistency, the parameters reported in Table S1 and S2 are for the parameters that give the best possible fit.

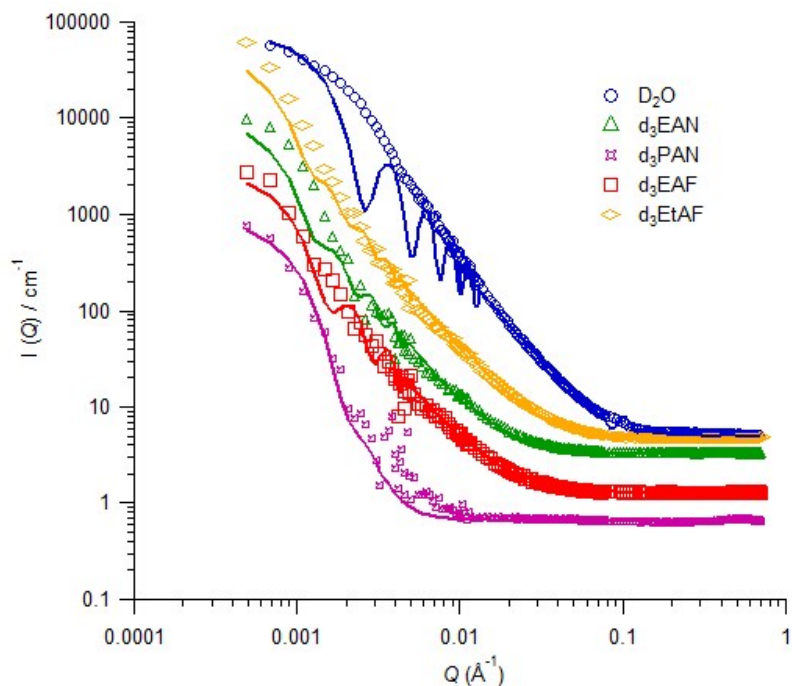

Figure S1. SANS patterns and fitting curves for 0.6 wt% EggPC in D<sub>2</sub>O and partially deuterated ionic liquids at 25 °C following the ethanol injection method. Arbitrary offset in the y-axis for clarity. Fitting parameters in Tables S1 & S2.

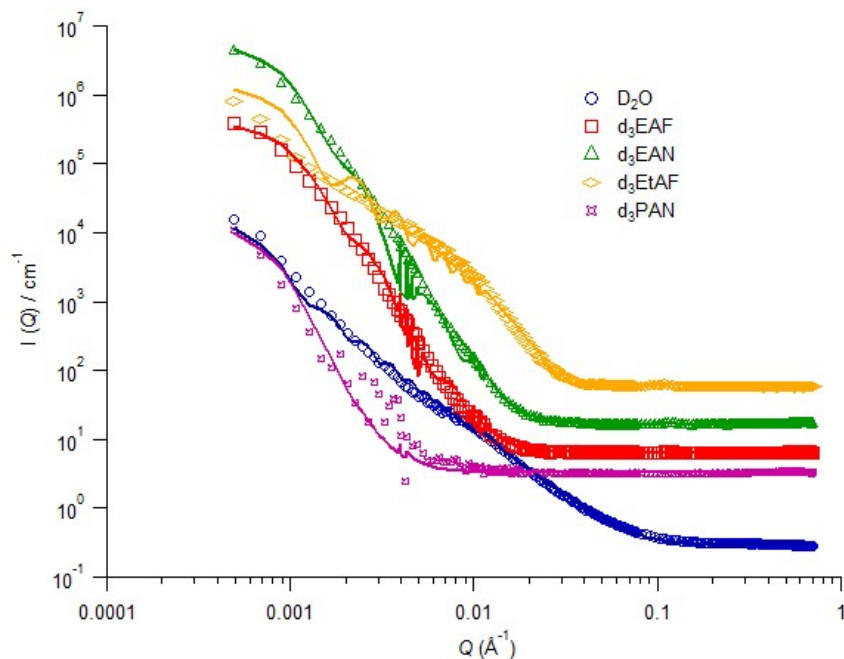

Figure S2. SANS patterns and fitting curves for 0.6 wt% DMPC in D<sub>2</sub>O and partially deuterated ionic liquids at 25 °C following the ethanol injection method. Arbitrary offset in the y-axis for clarity. Fitting parameters in Tables S1 & S2.

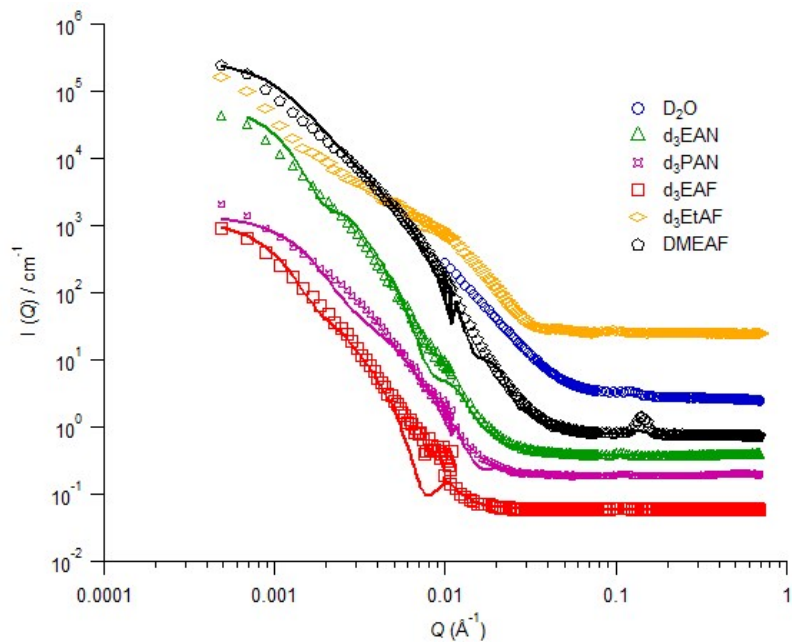

Figure S3. SANS patterns and fitting curves for 0.6 wt% DPPC in  $\text{D}_2\text{O}$  and partially deuterated ionic liquids at 25 °C following the ethanol injection method. Arbitrary offset in the y-axis for clarity. Fitting parameters in Tables S1 & S2.

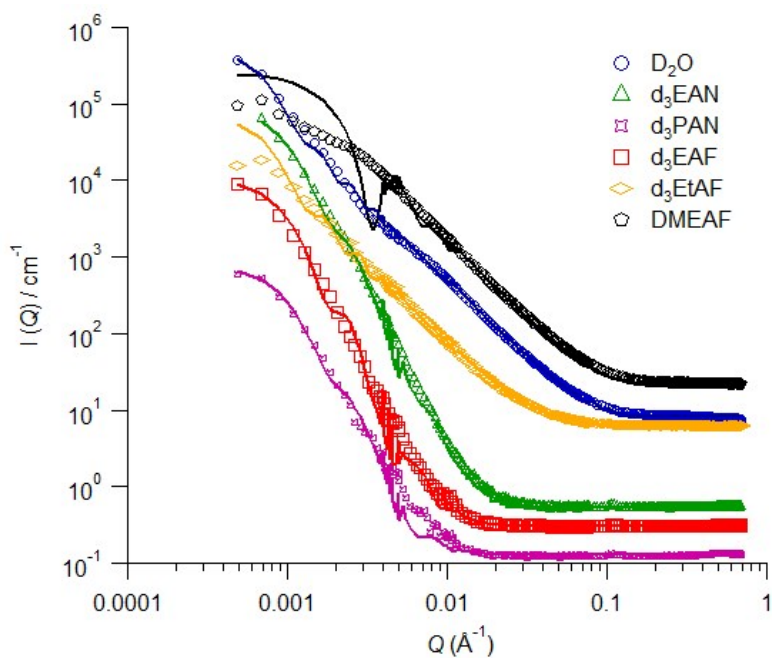

Figure S4. SANS patterns and fitting curves for 0.6 wt% DPPC in  $\text{D}_2\text{O}$  and partially deuterated ionic liquids at 48 °C following the ethanol injection method. Arbitrary offset in the y-axis for clarity. Fitting parameters in Tables S1 & S2.

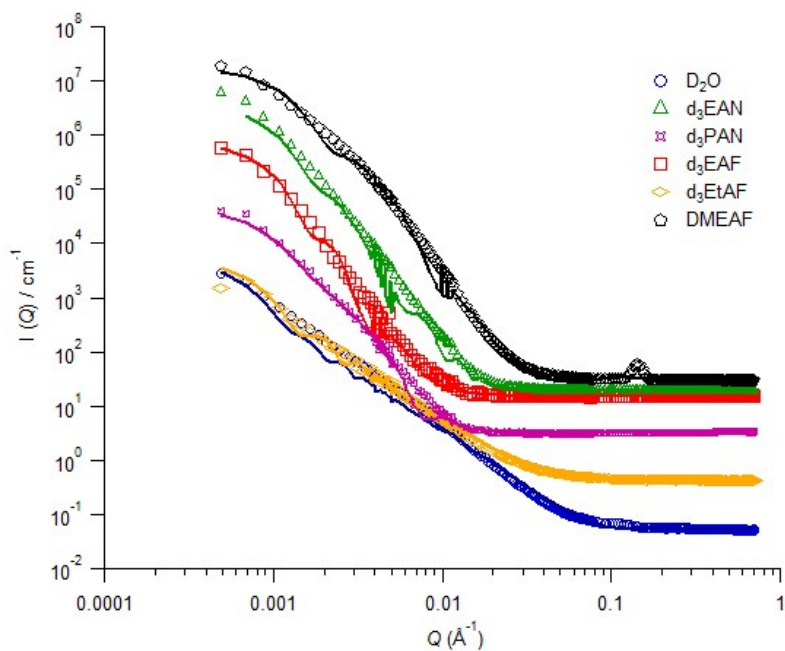

Figure S5. SANS patterns and fitting curves for 0.6 wt% DPPC in D<sub>2</sub>O and partially deuterated ionic liquids at 25 °C following the ethanol injection method, and heating to 48 °C. Arbitrary offset in the y-axis for clarity. Fitting parameters in Tables S1 & S2.

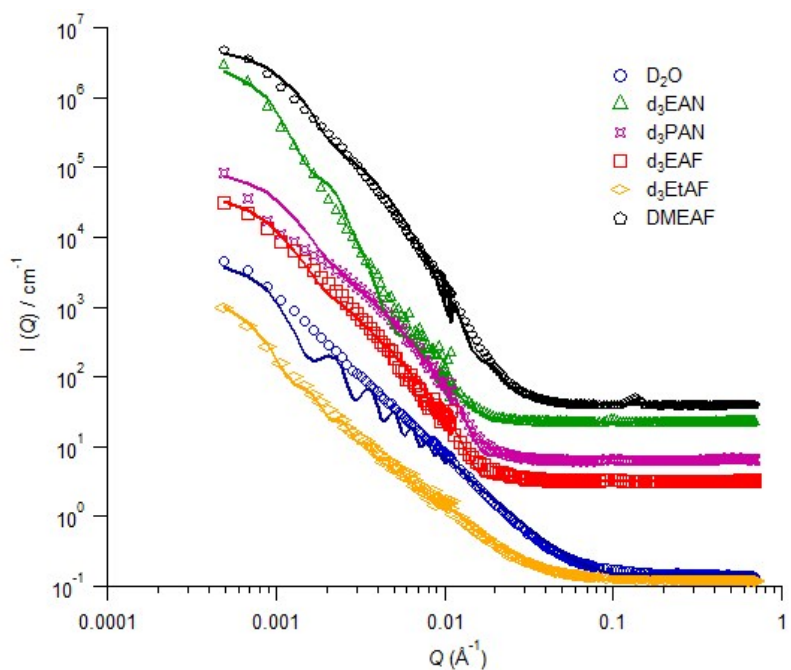

Figure S6. SANS patterns and fitting curves for 0.6 wt% DSPC in D<sub>2</sub>O and partially deuterated ionic liquids at 25 °C following the ethanol injection method. Arbitrary offset in the y-axis for clarity. Fitting parameters in Tables S1 & S2.

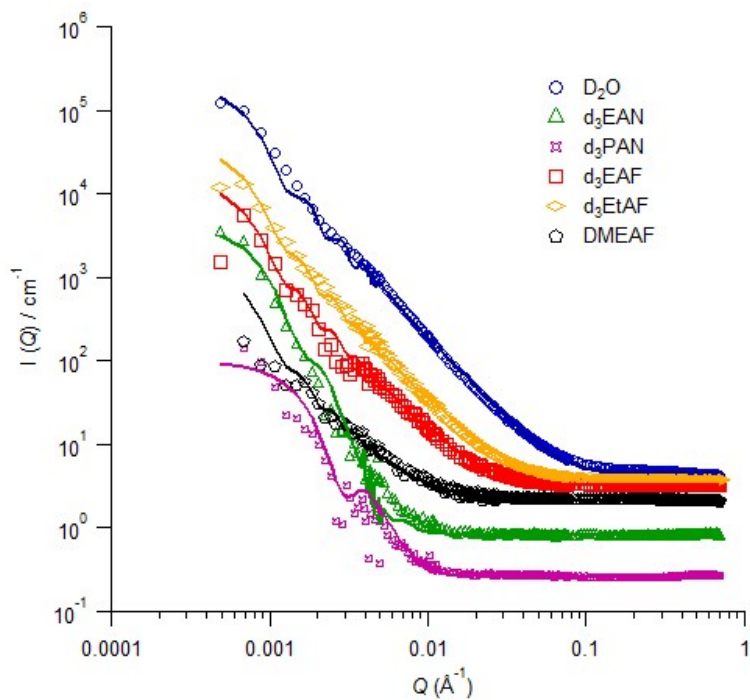

Figure S7. SANS patterns and fitting curves for 0.6 wt% DSPC in D<sub>2</sub>O and partially deuterated ionic liquids at 65 °C following the ethanol injection method. Arbitrary offset in the y-axis for clarity. Fitting parameters in Tables S1 & S2.

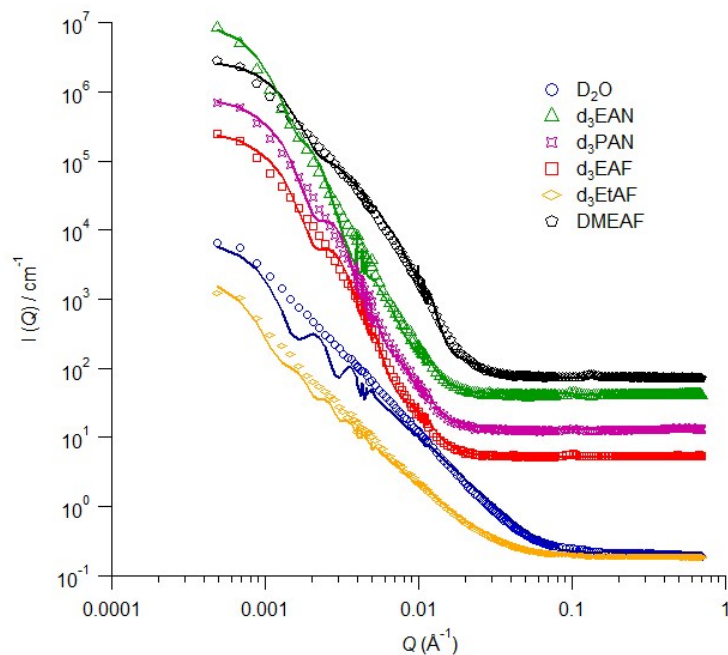

Figure S8. SANS patterns and fitting curves for 0.6 wt% DSPC in D<sub>2</sub>O and partially deuterated ionic liquids at 25 °C following the ethanol injection method and heating to 65 °C. Arbitrary offset in the y-axis for clarity. Fitting parameters in Tables S1 & S2.

Table S1. Parameters for separated form factor (SFF) model of best fit for each solvent/lipid combination that had unilamellar vesicles (ULVs). Head group SLD set to 1E-06 ( $\text{\AA}^{-2}$ ) in all cases.

|                      |       | Bkg<br>( $\text{cm}^{-1}$ )     | Tail<br>width<br>( $\text{\AA}$ ) | Head<br>width<br>( $\text{\AA}$ ) | Radius<br>( $\text{\AA}$ ) | Scale  | SLD Tail<br>( $\text{\AA}^{-2}$ ) | SLD<br>Solvent<br>( $\text{\AA}^{-2}$ ) | Total<br>Thickness<br>( $\text{\AA}$ ) |
|----------------------|-------|---------------------------------|-----------------------------------|-----------------------------------|----------------------------|--------|-----------------------------------|-----------------------------------------|----------------------------------------|
| EggPC                | D2O   | 0.25                            | 25                                | 10                                | 400                        | 0.0200 | -2.86E-07                         | 6.30E-06                                | 45.00                                  |
| EggPC                | D2O   | 0.25                            | 15                                | 5                                 | 400                        | 0.0650 | -2.86E-07                         | 6.30E-06                                | 25.00                                  |
| EggPC                | EAN   | 0.64                            | 40                                | 10                                | 900                        | 0.0010 | -2.86E-07                         | 3.30E-06                                | 60.00                                  |
| EggPC                | EAF   | 0.64                            | 35                                | 10                                | 950                        | 0.0018 | -2.86E-07                         | 2.55E-06                                | 55.00                                  |
| EggPC                | EtAF  | 0.58                            | 35                                | 8                                 | 1000                       | 0.0034 | -2.86E-07                         | 3.14E-06                                | 51.00                                  |
| DMPC                 | D2O   | 0.30                            | 25                                | 10                                | 1000                       | 0.0035 | -2.86E-07                         | 6.30E-06                                | 45.00                                  |
| DPPC<br>25 °C        | D2O   | Scattering at 20m not collected |                                   |                                   |                            |        |                                   |                                         |                                        |
| DPPC<br>48 °C        | D2O   | 0.27                            | 20                                | 12                                | 1000                       | 0.0050 | -2.86E-07                         | 6.30E-06                                | 44.00                                  |
| DPPC<br>25 °C<br>rpt | D2O   | 0.27                            | 40                                | 10                                | 1000                       | 0.0021 | -2.86E-07                         | 6.30E-06                                | 60.00                                  |
| DPPC<br>25 °C        | EtAF  | Does not fit well to any models |                                   |                                   |                            |        |                                   |                                         |                                        |
| DPPC<br>48 °C        | EtAF  | 0.63                            | 40                                | 10                                | 900                        | 0.0043 | -2.86E-07                         | 3.14E-06                                | 60.00                                  |
| DPPC<br>25 °C<br>rpt | EtAF  | 0.62                            | 35                                | 10                                | 800                        | 0.0070 | -2.86E-07                         | 3.14E-06                                | 55.00                                  |
| DPPC<br>48 °C        | DMEAF | 0.73                            | 30                                | 10                                | 300                        | 0.2200 | 6.01E-06                          | 2.90E-07                                | 50.00                                  |
| DSPC<br>25 °C        | D2O   | 0.29                            | 37                                | 10                                | 700                        | 0.0036 | -2.86E-07                         | 6.30E-06                                | 57.00                                  |
| DSPC<br>65 °C        | D2O   | 0.31                            | 31                                | 7                                 | 900                        | 0.0032 | -2.86E-07                         | 6.30E-06                                | 45.00                                  |
| DSPC<br>25 °C<br>rpt | D2O   | 0.31                            | 40                                | 10                                | 700                        | 0.0035 | -2.86E-07                         | 6.30E-06                                | 60.00                                  |
| DSPC<br>65 °C        | EAF   | 0.65                            | 50                                | 10                                | 1000                       | 0.0012 | -2.86E-07                         | 2.55E-06                                | 70.00                                  |
| DSPC<br>25 °C        | EtAF  | 0.60                            | 30                                | 10                                | 1000                       | 0.0048 | -2.86E-07                         | 3.14E-06                                | 50.00                                  |
| DSPC<br>65 °C        | EtAF  | 0.63                            | 35.0000                           | 15                                | 1000                       | 0.0055 | -2.86E-07                         | 3.14E-06                                | 65.00                                  |
| DSPC<br>25 °C<br>rpt | EtAF  | 0.63                            | 30.0000                           | 10                                | 1000                       | 0.0085 | -2.86E-07                         | 3.14E-06                                | 50.00                                  |
| DSPC<br>65 °C        | DMEAF | 0.70                            | 20.0000                           | 10                                | 1000                       | 0.0004 | 6.01E-06                          | 2.90E-07                                | 40.00                                  |

Table S2. Parameters for multishell model of best fit for each solvent/lipid combination that had multilamellar vesicles (MLVs). Shell SLD was  $-2.86\text{E-}7$  ( $\text{\AA}^{-2}$ ), except in DMEAF when it was  $6.01\text{E-}6$  ( $\text{\AA}^{-2}$ ).

|                   |       | Bkg<br>( $\text{cm}^{-1}$ ) | Scale  | Radius<br>( $\text{\AA}$ ) | Core SLD<br>( $\text{\AA}^{-2}$ ) | No.<br>Pairs | Shell<br>Width | Head<br>Width | Polydisp<br>ersity | D* From<br>Fit ( $\text{\AA}$ ) | D* From<br>Peak ( $\text{\AA}$ ) |
|-------------------|-------|-----------------------------|--------|----------------------------|-----------------------------------|--------------|----------------|---------------|--------------------|---------------------------------|----------------------------------|
| DMPC              | EAN   | 0.55                        | 0.0047 | 992                        | 3.30E-06                          | 30           | 39.9           | 15.049        | 0.40413            | 54                              | 52                               |
| DMPC              | EAF   | 0.64                        | 0.0030 | 900                        | 2.55E-06                          | 25           | 35             | 15            | 0.39967            | 50                              | 54                               |
| DMPC              | EtAF  | 0.60                        | 0.0100 | 2000                       | 3.14E-06                          | 10           | 15             | 2             | 0                  | 17                              | 57                               |
| DPPC 25<br>°C     | EAN   | 0.52                        | 0.0046 | 856                        | 3.30E-06                          | 23           | 29.824         | 2.0883        | 0.4                | 31                              | 56                               |
| DPPC 48<br>°C     | EAN   | 0.52                        | 0.0030 | 1000                       | 3.30E-06                          | 23           | 40.00          | 10.00         | 0.48               | 50                              | 56                               |
| DPPC 25<br>°C rpt | EAN   | 0.52                        | 0.0030 | 997                        | 3.30E-06                          | 26           | 40.01          | 9.99          | 0.48               | 49                              | 56                               |
| DPPC 25<br>°C     | PAN   | 0.64                        | 0.0017 | 700                        | 2.70E-06                          | 15           | 23.00          | 5.00          | 0.48               | 28                              | 56                               |
| DPPC 48<br>°C     | PAN   | 0.64                        | 0.0002 | 1000                       | 2.70E-06                          | 40           | 23.00          | 5.00          | 0.48               | 28                              | 56                               |
| DPPC 25<br>°C rpt | PAN   | 0.65                        | 0.0006 | 894                        | 2.70E-06                          | 31           | 21.91          | 5.81          | 0.67               | 27                              | 56                               |
| DPPC 25<br>°C     | EAF   | 0.59                        | 0.0010 | 899                        | 2.50E-06                          | 20           | 34.19          | 7.36          | 0.70               | 41                              | No peak                          |
| DPPC 48<br>°C     | EAF   | 0.60                        | 0.0008 | 1100                       | 2.50E-06                          | 30           | 40.00          | 8.63          | 0.20               | 48                              | 56                               |
| DPPC 25<br>°C rpt | EAF   | 0.60                        | 0.0008 | 1099                       | 2.50E-06                          | 36           | 40.35          | 8.71          | 0.20               | 49                              | No peak                          |
| DPPC 25<br>°C     | DMEAF | 0.75                        | 0.0199 | 576                        | 2.90E-07                          | 12           | 34.11          | 10.14         | 0.76               | 44                              | 43                               |
| DPPC 25<br>°C rpt | DMEAF | 0.74                        | 0.0170 | 1000                       | 2.90E-07                          | 14           | 35.27          | 12.00         | 0.30               | 47                              | 43                               |
| DSPC 25<br>°C     | EAN   | 0.55                        | 0.0017 | 1500                       | 3.30E-06                          | 20           | 55.00          | 10.00         | 0.20               | 65                              | 64                               |
| DSPC 65<br>°C     | EAN   | 0.53                        | 0.0010 | 1500                       | 3.30E-06                          | 25           | 35.00          | 15.00         | 0.20               | 50                              | 61.96                            |
| DSPC 25<br>°C rpt | EAN   | 0.54                        | 0.0030 | 1200                       | 3.30E-06                          | 25           | 48.70          | 17.00         | 0.31               | 65                              | 61.96                            |
| DSPC 25<br>°C     | PAN   | 0.65                        | 0.0030 | 1000                       | 2.70E-06                          | 8            | 40.00          | 6.03          | 0.50               | 46                              | 59.22                            |
| DSPC 65<br>°C     | PAN   | 0.65                        | 0.0001 | 800                        | 2.70E-06                          | 13           | 30.00          | 6.03          | 0.20               | 36                              | No Peak                          |
| DSPC 25<br>°C rpt | PAN   | 0.65                        | 0.0024 | 900                        | 2.70E-06                          | 20           | 49.98          | 6.01          | 0.20               | 56                              | 61                               |
| DSPC 25<br>°C     | EAF   | 0.64                        | 0.0020 | 1243                       | 2.55E-06                          | 7            | 56.12          | 6.25          | 0.47               | 62                              | 65                               |
| DSPC 25<br>°C rpt | EAF   | 0.65                        | 0.0025 | 1000                       | 2.55E-06                          | 16           | 50.00          | 10.00         | 0.20               | 60                              | 61                               |
| DSPC 25<br>°C     | DMEAF | 0.78                        | 0.0060 | 1014                       | 2.90E-07                          | 12           | 31.61          | 8.00          | 0.38               | 39                              | 46                               |
| DSPC 25<br>°C rpt | DMEAF | 0.72                        | 0.0025 | 1014                       | 2.90E-07                          | 10           | 31.61          | 8.00          | 0.38               | 39                              | 46                               |

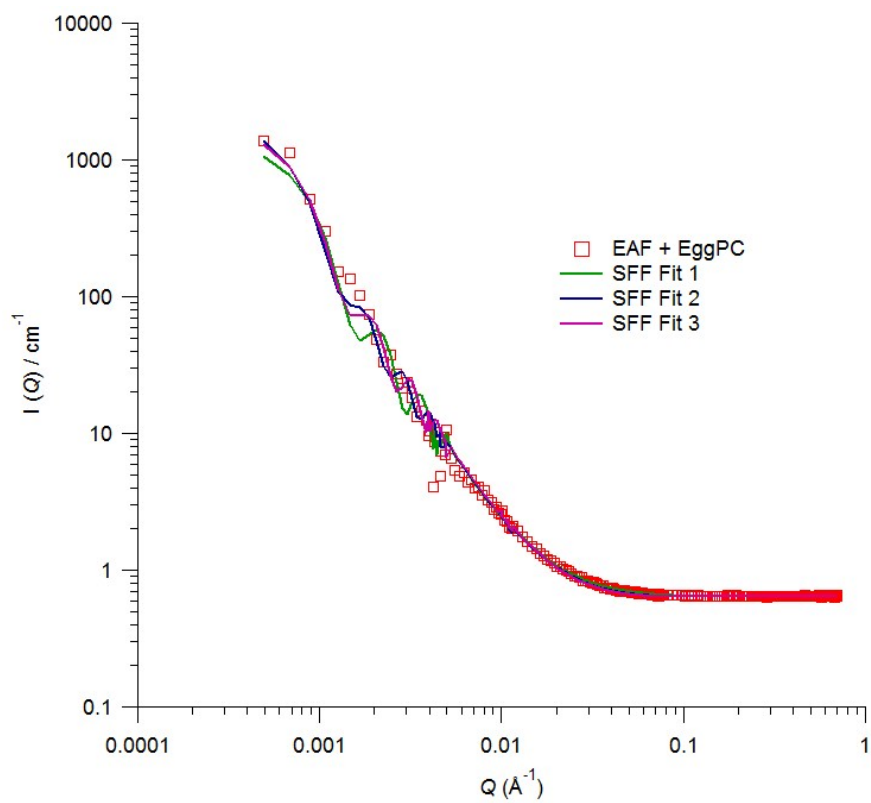

Figure S9. SANS data for EggPC in EAF at 25 °C with three different fits using the SFF model. Parameters for each fit shown in Table S3.

Table S3. Comparison of parameters for three different SFF fits for EggPC in EAF, as modelled in Figure 9.

|              | <b>Bkg</b><br>(cm <sup>-1</sup> ) | <b>Tail</b><br><b>width</b><br>(Å) | <b>Head</b><br><b>width</b><br>(Å) | <b>Radius</b><br>(Å) | <b>Scale</b> | <b>SLD Tail</b><br>(Å <sup>-2</sup> ) | <b>SLD</b><br><b>Solvent</b><br>(Å <sup>-2</sup> ) | <b>Total</b><br><b>Thickness</b><br>(Å) |
|--------------|-----------------------------------|------------------------------------|------------------------------------|----------------------|--------------|---------------------------------------|----------------------------------------------------|-----------------------------------------|
| <b>Fit 1</b> | 0.64                              | 35                                 | 10                                 | 950                  | 0.0018       | -2.86E-07                             | 2.55E-06                                           | 55.00                                   |
| <b>Fit 2</b> | 0.64                              | 55                                 | 10                                 | 875                  | 0.0010       | -2.86E-07                             | 2.55E-06                                           | 75.00                                   |
| <b>Fit 3</b> | 0.64                              | 60                                 | 15                                 | 790                  | 0.0010       | -2.86E-07                             | 2.55E-06                                           | 90.00                                   |
